# Supplementary material for: Antipsychotic pharmacogenomics in first episode psychosis: a role for glutamate genes
Source: PubMed Central journal article supplement (PMC4872428; doi:10.1038/tp.2016.10), 2016-02-23
Supplement: tp201610x2.pdf [file tp201610x2.pdf]

**Supplementary Table 1. Strongest associations from candidate gene study.** EMP1: pointwise p-value, EMP2: experiment-wise p-value; \* SNP is within window of +/- 50 kilobases from candidate gene *HOMER2*.

| rs#        | Gene          | EMP1    | EMP2    |
|------------|---------------|---------|---------|
| rs2069062  | GRM7          | 0.00012 | 0.01157 |
| rs1532544  | <i>GRM7</i>   | 0.0004  | 0.03949 |
| rs3804850  | GRM7          | 0.00126 | 0.0979  |
| rs598134   | <i>GRM5</i>   | 0.00135 | 0.114   |
| rs1472476  | GRM7          | 0.00151 | 0.1227  |
| rs17376808 | <i>PLCB1</i>  | 0.00203 | 0.1528  |
| rs332938   | GRM7          | 0.00231 | 0.1772  |
| rs12905235 | <i>WHAMM*</i> | 0.00255 | 0.1879  |
| rs10899699 | <i>SHANK2</i> | 0.00297 | 0.2174  |
| rs11018463 | <i>GRM5</i>   | 0.00311 | 0.2261  |
