# Supplementary material for: Antipsychotic pharmacogenomics in first episode psychosis: a role for glutamate genes
Source: PubMed Central journal article supplement (PMC4872428; doi:10.1038/tp.2016.10), 2016-02-23
Supplement: tp201610x3.pdf [file tp201610x3.pdf]

**Supplementary Table 2. Strongest associations from candidate gene study in schizophrenia-spectrum illness subset.** EMP1: pointwise p-value, EMP2: experiment-wise p-value; \* SNP is within window of +/- 50 kilobases from candidate gene *SLC1A1*.

| rs#        | Gene            | EMP1    | EMP2    |
|------------|-----------------|---------|---------|
| rs2069062  | <i>GRM7</i>     | 0.00019 | 0.02619 |
| rs598134   | <i>GRM5</i>     | 0.0005  | 0.04511 |
| rs12273644 | <i>SLC1A2</i>   | 0.0017  | 0.1411  |
| rs17752444 | <i>GRM7</i>     | 0.00187 | 0.1465  |
| rs17096210 | <i>GRIA1</i>    | 0.00264 | 0.1913  |
| rs516273   | <i>GRIK3</i>    | 0.00296 | 0.2215  |
| rs1532544  | <i>GRM7</i>     | 0.00275 | 0.2322  |
| rs3804850  | <i>GRM7</i>     | 0.00402 | 0.2672  |
| rs653216   | <i>SHANK2</i>   | 0.0038  | 0.276   |
| rs10974671 | <i>SPATA6L*</i> | 0.00352 | 0.2832  |
