# Supplementary material for: Antipsychotic pharmacogenomics in first episode psychosis: a role for glutamate genes
Source: PubMed Central journal article supplement (PMC4872428; doi:10.1038/tp.2016.10), 2016-02-23
Supplement: tp201610x4.pdf [file tp201610x4.pdf]

**Supplementary Table 3. 20 strongest associations with change on positive subscale of BPRS in genome-wide analysis.**

| Rank | Chromosome | rsID       | Gene           | Region     | $-\log_{10}$ p-value |
|------|------------|------------|----------------|------------|----------------------|
| 1    | 8          | rs1561296  | <i>CSMD1</i>   | Intron     | 6.79                 |
| 2    | 18         | rs8091220  | intergenic     | -          | 6.60                 |
| 3    | 18         | rs4939668  | intergenic     | -          | 5.96                 |
| 4    | 8          | rs10504371 | intergenic     | -          | 5.77                 |
| 5    | 8          | rs6981424  | intergenic     | -          | 5.63                 |
| 6    | 18         | rs9957078  | intergenic     | -          | 5.48                 |
| 7    | 2          | rs1561296  | <i>SPATS2L</i> | Intron     | 5.37                 |
| 8    | 13         | rs1330968  | intergenic     | -          | 5.11                 |
| 9    | 4          | rs2071680  | <i>ZFYVE28</i> | Exon       | 5.09                 |
| 10   | 1          | rs10802563 | <i>ACTN2</i>   | Downstream | 5.02                 |
| 11   | 3          | rs2367607  | intergenic     | -          | 4.97                 |
| 12   | 5          | rs4398676  | <i>LPCAT1</i>  | Intron     | 4.96                 |
| 13   | 8          | rs2624095  | <i>CSMD1</i>   | Intron     | 4.82                 |
| 14   | 20         | rs6046528  | <i>RIN2</i>    | Downstream | 4.79                 |
| 15   | 9          | rs773146   | <i>NMRK1</i>   | Downstream | 4.77                 |
| 16   | 20         | rs6017147  | <i>MYBL2</i>   | Intron     | 4.58                 |
| 17   | 1          | rs2076590  | <i>FAM212B</i> | Downstream | 4.56                 |
| 18   | 14         | rs1956243  | intergenic     | -          | 4.50                 |
| 19   | 18         | rs12954691 | <i>MRO</i>     | Upstream   | 4.50                 |
| 20   | 5          | rs1191746  | intergenic     | -          | 4.46                 |
