# Supplementary material for: Antipsychotic pharmacogenomics in first episode psychosis: a role for glutamate genes
Source: PubMed Central journal article supplement (PMC4872428; doi:10.1038/tp.2016.10), 2016-02-23
Supplement: tp201610x5.pdf [file tp201610x5.pdf]

**Supplementary Table 4. 20 strongest associations with change on negative subscale of BPRS in genome-wide analysis.**

| Rank | Chromosome | rsID       | Gene           | Region     | $-\log_{10}$ p-value |
|------|------------|------------|----------------|------------|----------------------|
| 1    | 5          | rs13172193 | intergenic     | -          | 4.95                 |
| 2    | 2          | rs2368445  | intergenic     | -          | 4.83                 |
| 3    | 12         | rs11107334 | intergenic     | -          | 4.81                 |
| 4    | 1          | rs17033865 | intergenic     | -          | 4.80                 |
| 5    | 3          | rs11915963 | <i>CACNA1D</i> | Intron     | 4.67                 |
| 6    | 12         | rs11108366 | <i>HAL</i>     | Intron     | 4.65                 |
| 7    | 1          | rs10489747 | <i>RXRG</i>    | Intron     | 4.64                 |
| 8    | 2          | rs6743618  | <i>PKP4</i>    | Intron     | 4.63                 |
| 9    | 11         | rs10837340 | <i>OR52J1P</i> | Upstream   | 4.61                 |
| 10   | 16         | rs3764286  | <i>USP10</i>   | Intron     | 4.55                 |
| 11   | 11         | rs1466267  | <i>OR52E3P</i> | Downstream | 4.50                 |
| 12   | 10         | rs2994684  | intergenic     | -          | 4.50                 |
| 13   | 3          | rs879716   | <i>CLSTN2</i>  | Intron     | 4.47                 |
| 14   | 21         | rs2823794  | intergenic     | -          | 4.45                 |
| 15   | 10         | rs4550135  | intergenic     | -          | 4.44                 |
| 16   | 11         | rs17538527 | <i>OR9Q1</i>   | Intron     | 4.37                 |
| 17   | 8          | rs272610   | intergenic     | -          | 4.35                 |
| 18   | 10         | rs7907704  | intergenic     | -          | 4.33                 |
| 19   | 1          | rs3120133  | <i>ABCA4</i>   | Intron     | 4.31                 |
| 20   | 1          | rs3120133  | <i>ABCA4</i>   | Intron     | 4.31                 |
