# Supplementary material for: Antipsychotic pharmacogenomics in first episode psychosis: a role for glutamate genes
Source: PubMed Central journal article supplement (PMC4872428; doi:10.1038/tp.2016.10), 2016-02-23
Supplement: tp201610x6.pdf [file tp201610x6.pdf]

**Supplementary Table 5. Stratified analysis of *GRID2* rs1875705.** BPD: Bipolar disorder, MDD: major depressive disorder, CPZ: chlorpromazine equivalents.

|                           | White (n=37) |        | Black (n=35) |        | Hispanic/Asian/<br>Native American<br>(n=14) |       |
|---------------------------|--------------|--------|--------------|--------|----------------------------------------------|-------|
| Variable                  | $\beta$      | p      | $\beta$      | p      | $\beta$                                      | p     |
| BPD diagnosis             | 3.4          | 0.41   | 8.7          | 0.004  | 5.2                                          | 0.14  |
| MDD diagnosis             | 7.6          | 0.03   | -2.2         | 0.62   | 10.4                                         | 0.02  |
| Baseline BPRS             | 0.4          | 0.001  | 0.54         | <0.001 | 0.29                                         | 0.07  |
| ln CPZ                    | -1.4         | 0.31   | -1.8         | 0.17   | -1.2                                         | 0.50  |
| <i>GRID2</i><br>rs1875705 | -5.5         | <0.001 | -6.8         | <0.001 | -5.9                                         | 0.009 |
| Model r <sup>2</sup>      | 0.60         |        | 0.59         |        | 0.68                                         |       |
