# Supplementary material for: Antipsychotic pharmacogenomics in first episode psychosis: a role for glutamate genes
Source: PubMed Central journal article supplement (PMC4872428; doi:10.1038/tp.2016.10), 2016-02-23
Supplement: tp201610x7.pdf [file tp201610x7.pdf]

**Supplementary Table 6. 20 strongest associations from genome-wide analysis of schizophrenia-spectrum illness subset.**

| Rank | Chromosome | rsID       | Gene          | Region     | $-\log_{10}$ p-value |
|------|------------|------------|---------------|------------|----------------------|
| 1    | 8          | rs687279   | intergenic    | -          | 7.84                 |
| 2    | 4          | rs9307122  | <i>GRID2</i>  | intron     | 7.65                 |
| 3    | 4          | rs1875705  | <i>GRID2</i>  | intron     | 7.65                 |
| 4    | 4          | rs994011   | <i>GRID2</i>  | intron     | 5.78                 |
| 5    | 18         | rs12954691 | <i>MRO</i>    | upstream   | 5.77                 |
| 6    | 8          | rs673745   | intergenic    | -          | 5.24                 |
| 7    | 8          | rs418269   | intergenic    | -          | 5.04                 |
| 8    | 4          | rs10939542 | intergenic    | -          | 5.03                 |
| 9    | 8          | rs804280   | <i>GATA4</i>  | intron     | 4.86                 |
| 10   | 16         | rs11864396 | <i>RBFOX1</i> | intron     | 4.76                 |
| 11   | 5          | rs6594905  | intergenic    | -          | 4.69                 |
| 12   | 7          | rs16100    | <i>NPY</i>    | downstream | 4.66                 |
| 13   | 7          | rs16101    | <i>NPY</i>    | downstream | 4.66                 |
| 14   | 6          | rs12215657 | <i>LAMA2</i>  | intron     | 4.65                 |
| 15   | 16         | rs7499973  | <i>WWOX</i>   | intron     | 4.54                 |
| 16   | 2          | rs6746182  | <i>LRPPRC</i> | upstream   | 4.54                 |
| 17   | 21         | rs3119486  | intergenic    | -          | 4.54                 |
| 18   | 10         | rs10886048 | intergenic    | -          | 4.50                 |
| 19   | 1          | rs10922670 | <i>LRRC8B</i> | downstream | 4.49                 |
| 20   | 14         | rs12590805 | intergenic    | -          | 4.49                 |
