# Supplementary material for: Antipsychotic pharmacogenomics in first episode psychosis: a role for glutamate genes
Source: PubMed Central journal article supplement (PMC4872428; doi:10.1038/tp.2016.10), 2016-02-23
Supplement: tp201610x8.pdf [file tp201610x8.pdf]

**Supplementary Table 7. Functional annotation categories of genes containing SNPs highly associated with antipsychotic treatment response**

| <b>Study Sample</b> | <b>Functions Annotation</b> | <b>Fishers Exact p-value (unadj)</b> | <b>BH p-value (adj)</b> | <b>Genes with evidence of involvement in neuritogenesis and/or neuronal development</b>                                                                                            |
|---------------------|-----------------------------|--------------------------------------|-------------------------|------------------------------------------------------------------------------------------------------------------------------------------------------------------------------------|
| First Episode       | neuritogenesis              | 2.30E-05                             | 1.67E-03                | <i>ATF6, ATP8A2, CNTNAP2, DDAH1, EPB41L3, GRID2, LAMA1, MAP2, MYO5B, NUMB, PALLD, PIP5K1B, PPP3CA, PRKCE, RNF165, THBS4, UNC13A, WWOX</i>                                          |
|                     | development of neurons      | 8.42E-05                             | 5.66E-03                |                                                                                                                                                                                    |
|                     | morphogenesis of neurites   | 1.74E-03                             | 5.17E-02                |                                                                                                                                                                                    |
|                     |                             |                                      |                         |                                                                                                                                                                                    |
| CATIE Risperidone   | development of neurons      | 2.72E-09                             | 6.80E-07                | <i>CAST, CTNNA2, CUX2, DMD, DSCAM, FGFR2, ITPR1, LRRC4C, MPZ, MYO16, NRCAM, NRG1, NRP1, NTF3, NYAP2, PRKG1, PTPRE, RIMS1, ROBO2, ROR1, RYR2, SHANK2, TIAM2, TRIM9, TRPC1, WWOX</i> |
|                     | neuritogenesis              | 3.53E-09                             | 7.79E-07                |                                                                                                                                                                                    |
|                     | morphogenesis of neurites   | 5.57E-08                             | 6.95E-08                |                                                                                                                                                                                    |
|                     |                             |                                      |                         |                                                                                                                                                                                    |

BH: Benjamini-Hochberg adjustment for multiple comparisons
